# Supplementary material for: New Immunohistochemical Markers for Pleural Mesothelioma Subtyping
Source: MDPI journal article supplement (doi:10.3390/diagnostics13182945), 2023-09-14
Supplement: s1 [file s1]

Table S1. High immunohistochemical expression (> cut-off) among subtypes: Training and Validation cohort.

| Training cohort                 |            |            |            |            |            |
|---------------------------------|------------|------------|------------|------------|------------|
|                                 | Mesothelin | Claudin-15 | CFB        | PAI1       | PAK4       |
| <b>Training cohort (n=73)</b>   | 37 (50.7%) | 26 (35.6%) | 25 (32.2%) | 46 (63%)   | 54 (74%)   |
| <b>ES (n=31)</b>                | 31 (100%)  | 21 (67.7%) | 18 (58.1%) | 11 (35.5%) | 18 (58.1%) |
| <b>BS (n=25)</b>                | 6 (24%)    | 3 (12%)    | 7 (28%)    | 20 (80%)   | 23 (92%)   |
| <b>SS (n=17)</b>                | 0 (0%)     | 2 (11.8%)  | 0 (0%)     | 15 (88.2%) | 13 (76.5%) |
| Validation cohort               |            |            |            |            |            |
|                                 | Mesothelin | Claudin-15 | CFB        | PAI1       | PAK4       |
| <b>Validation cohort (n=30)</b> | 14 (46.7%) | 11 (36.7%) | 9 (30%)    | 20 (66.7%) | 23 (76.7%) |
| <b>ES (n=11)</b>                | 10 (90.9%) | 8 (72.7%)  | 7 (63.6%)  | 8 (72.7%)  | 7 (63.6%)  |
| <b>BS (n=11)</b>                | 4 (36.4%)  | 3 (27.3%)  | 2 (18.2%)  | 6 (54.5%)  | 10 (90.9%) |
| <b>SS (n=8)</b>                 | 0 (0%)     | 0 (0%)     | 0 (0%)     | 6 (75%)    | 6 (75%)    |

ES: epithelioid subtype; BS: biphasic subtype; SS: sarcomatoid subtype; CFB: Complement factor B; PAI1: Plasminogen activator inhibitor 1, PAK4: p21-activated kinase 4.
