# Supplementary material for: New Immunohistochemical Markers for Pleural Mesothelioma Subtyping
Source: Diagnostics (Basel). 2023 Sep 14;13(18):2945. doi: 10.3390/diagnostics13182945 (PMC10529020; doi:10.3390/diagnostics13182945)
Supplement: Supplementary file 1 [file diagnostics-13-02945-s001.zip]

Archive with 4 entries (4 files):
- Figure_S1.tif
- Figure_S2.tif
- Supplement Figure Legends.pdf
- Supplement Table S1.pdf
